# Supplementary material
Source: Springer Nature journal article supplement (https://www.springermedizin.de/resource/supplementary/12879_2003_91_MOESM4_ESM.pdf/9448256)

Begg's funnel plot with pseudo 95% confidence limits

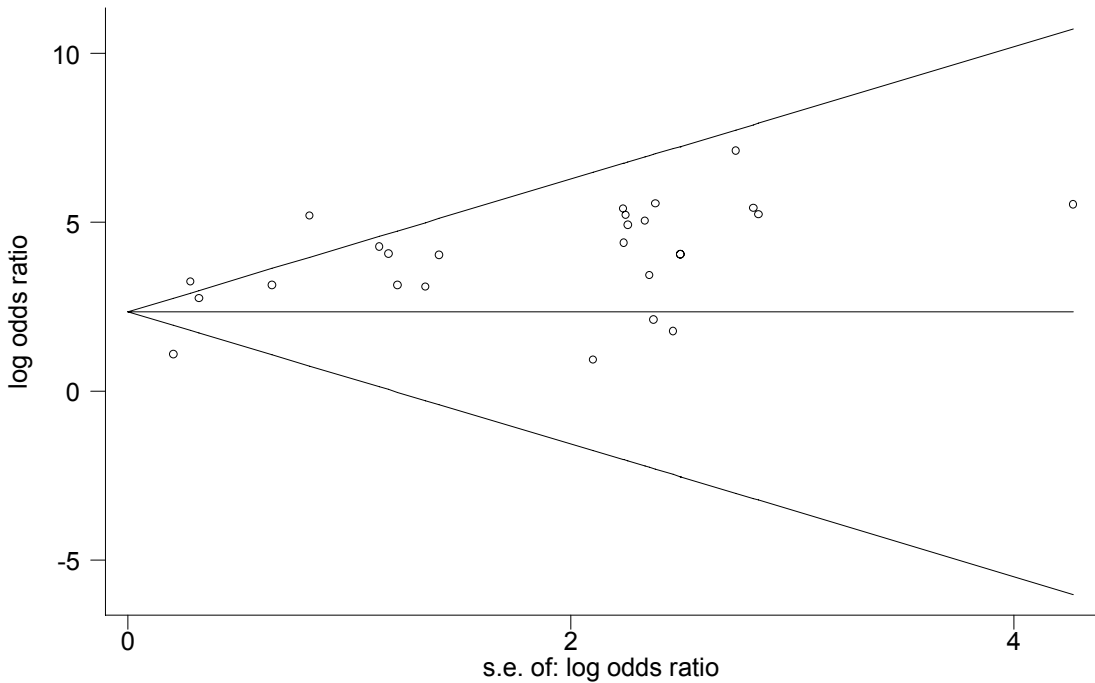

Supplement: MOESM4 [file 9448256]
